# Supplementary material for: Mesoporous TiO2/SiO2/Ag ternary composite aerogels for high photocatalysis
Source: Royal Society of Chemistry journal article supplement (doi:10.1039/c8nj06309e), 2019-01-01

### Mesoporous TiO<sub>2</sub>/ SiO<sub>2</sub>/Ag ternary composite aerogels for high photocatalysis

Xinfu Zhao <sup>\*1</sup>, Wei Ju <sup>1</sup>, Jian Zhang <sup>2</sup>, Benxue Liu <sup>1</sup>, Jing Zhang <sup>1</sup>, Xibin Yi <sup>\*1</sup>

<sup>1</sup>Shandong Provincial Key Laboratory of Special Silicone-Containing Materials, Advanced Materials Institute, Qilu

University of Technology (Shandong Academy of Sciences), Jinan 250014, P. R. China

<sup>2</sup>Department of Chemistry and Chemical Engineering, Jining University, Qufu 273100, PR China

\*Corresponding author:

Xibin Yi      Email: yixb@sdas.org      Tel.: +86-0531-82605448

Xinfu Zhao      Email: zhaoxinfu@sdas.org      Tel.: +86-0531-82605448

Fig. S1 Compression stress-strain curves and the corresponding Young's modulus of S<sub>1</sub>, S<sub>2</sub> and S<sub>3</sub>.

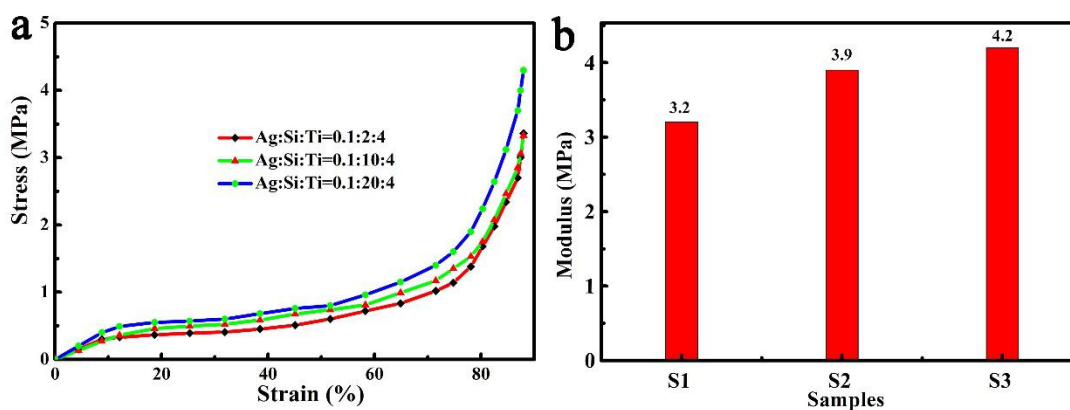

Fig. S2 EDS pattern of S<sub>2</sub>.

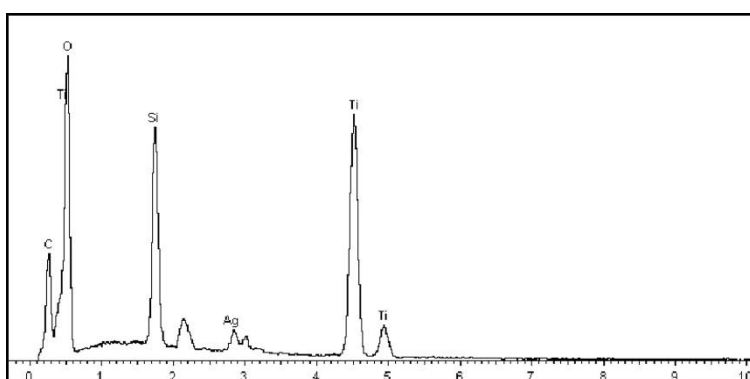

Fig. S3 FTIR spectrum of S<sub>2</sub>.

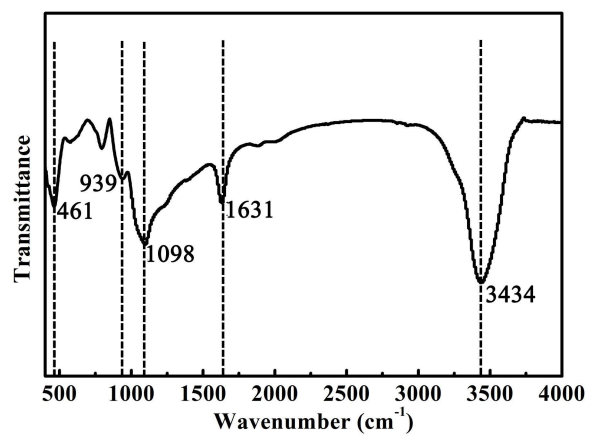

Fig. S4 Photoluminescence spectra of P25, TiO<sub>2</sub>/SiO<sub>2</sub> composite aerogel, S<sub>1</sub>, S<sub>2</sub> and S<sub>3</sub>.

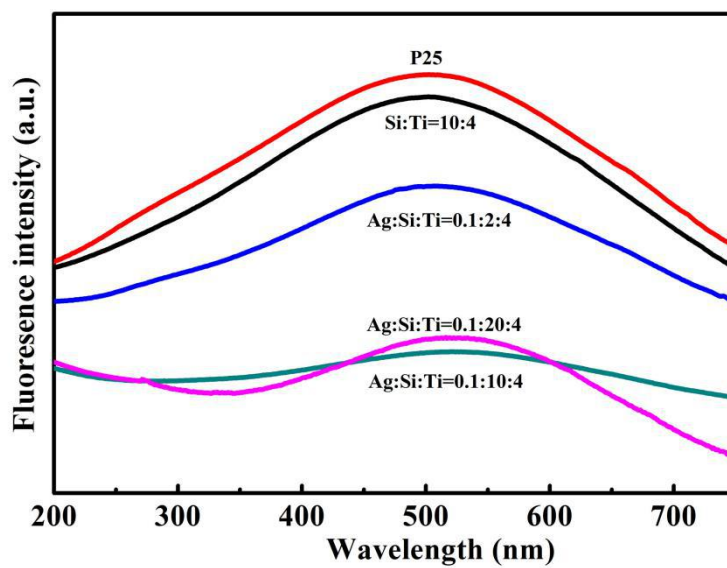

Fig. S5 Photocatalytic degradation curves of OTC over P25 and samples with different Ag content.

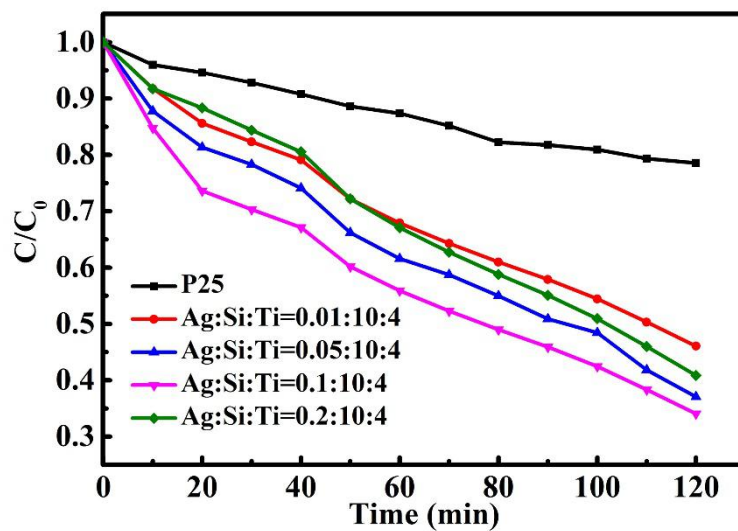

Fig. S6 SEM images of  $S_2$  before (a) and after (b) eighth cyclic experiments.

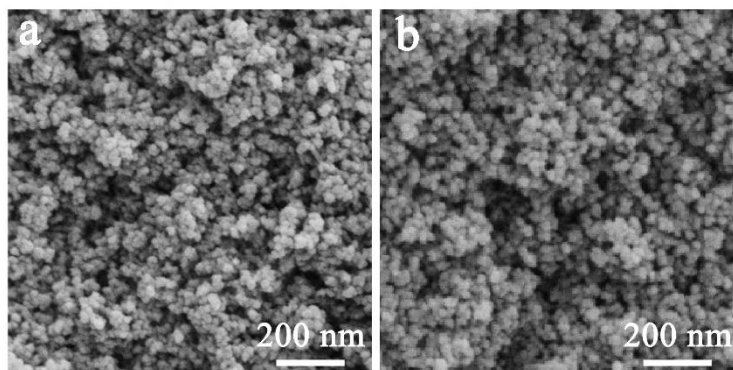

Supplement: c8nj06309e1.pdf [file c8nj06309e1.pdf]
